# Supplementary material for: A reprogrammable multifunctional chalcogenide guided-wave lens
Source: Royal Society of Chemistry journal article supplement (doi:10.1039/c8nr02100g), 2018-01-01
Supplement: c8nr02100g1.pdf [file c8nr02100g1.pdf]

Electronic Supplementary Material (ESI) for Nanoscale.

## Reprogrammable Multifunctional Chalcogenide Guided-wave Lens

Tun Cao<sup>\*a</sup>, Chen-Wei Wei<sup>a</sup>, Meng-Jia Cen<sup>a</sup>, Bao Guo<sup>a</sup>, Yong-June Kim<sup>b</sup>, Shuang Zhang<sup>c</sup> and Cheng-Wei Qiu<sup>\*b</sup>

<sup>a</sup>School of Optoelectronic Engineering and Instrumentation Science, Dalian University of Technology, 116024, China

<sup>b</sup>Department of Electrical and Computer Engineering, National University of Singapore, 4 Engineering Drive 3, Singapore 117583, Republic of Singapore

<sup>c</sup>School of Physics and Astronomy, University of Birmingham, Birmingham B15 2TT, UK

\*Corresponding Author: E-mail: chengwei.qiu@nus.edu.sg; caotun1806@dlut.edu.cn

### Section 1. Derivation of the refractive index profile of the curvature

As can be observed in the right column of Fig.1b, the curved surface  $S$  is produced by rotating a curve  $C$  symmetrically about the  $z$ -axis. The other two cylindrical coordinates are  $\rho$  and  $\vartheta$ . Herein, we specify the curve  $C$  and thus the surface  $S$  by providing  $\rho(s)$  or  $s(\rho)$  where  $s$  is the arc distance measured along the  $C$ . One could use as the surface coordinates either  $s$  and  $\vartheta$  or, on occasions,  $\rho$  and  $\vartheta$ . The surface metric that gives the distance  $dL$  between the neighboring points is shown by

$$dL^2 = ds^2 + \rho^2 d\theta^2 \quad \backslash^*$$

MERGEFORMAT (S1)

If we multiply the  $dL$  by  $n$ , the refractive index and optical distance  $d\zeta$  between the neighboring points can be expressed by

$$d\zeta^2 = n^2 (ds^2 + \rho^2 d\theta^2) \quad \backslash^*$$

MERGEFORMAT (S2)

If  $s$  and  $\vartheta$  are treated as the independent variables, Eq. (S2) may be rewritten as

$$d\zeta^2 = n(s)^2 (ds^2 + \rho(s)^2 d\theta^2) \quad \backslash^*$$

MERGEFORMAT (S3)

However, if  $\rho$  and  $\vartheta$  are chosen, it can be alternatively written as

$$d\zeta^2 = N(\rho)^2 (s'(\rho)^2 d\rho^2 + \rho^2 d\theta^2) \quad \backslash^*$$

MERGEFORMAT (S4)

where  $N(\rho)=n(s)$ . If we employ the bars over the quantities to present those relating to a particular structure and unbarred quantities for those associated with other equivalent structure<sup>34</sup>, the equivalence of the optical metrics, by Eq.(S2), requires

$$n^2 (ds^2 + \rho^2 d\theta^2) = \bar{n}^2 (\bar{d}\bar{s}^2 + \bar{\rho}^2 \bar{d}\bar{\theta}^2) \quad \backslash^*$$

MERGEFORMAT (S5)

where  $nds = \bar{n}\bar{d}\bar{s}$ ,  $n\rho = \bar{n}\bar{\rho}$ , and  $\theta = \bar{\theta}$ . It thus results in the behind set of integral relationships,

$$\int_a^s nds = \int_a^{\bar{s}} \bar{n}\bar{d}\bar{s} \quad \backslash^*$$

MERGEFORMAT (S6)

$$n\rho = \bar{n}\bar{\rho} \quad \backslash^*$$

MERGEFORMAT (S7)

$$\int_b^s ds/\rho = \int_b^{\bar{s}} \bar{d}\bar{s}/\bar{\rho} \quad \backslash^*$$

MERGEFORMAT (S8)

where  $a$  and  $\bar{a}$ ,  $b$  and  $\bar{b}$  show the values of  $s$  and  $\bar{s}$  corresponding to the equal points in the two guides<sup>34</sup>. We can then determine  $\bar{n}(\bar{s})$  and  $\bar{\rho}(\bar{s})$  when they correspond to the given guide. The mapping function  $\bar{s} = f(s)$  can be achieved by solving Eq. (S8) for  $\bar{s}$ . By setting  $\bar{s} = \bar{\rho} = r$  for a flat guide, Eqs. (S7) and (S8) are derived as following Eqs. (S9) and (S10), respectively.

$$N\rho = n(r)r \quad \backslash^*$$

MERGEFORMAT (S9)

$$\int_b^s ds/\rho = \int_1^r dr/r = \ln r \quad \backslash^*$$

MERGEFORMAT (S10)

Thus the mapping function is

$$r = f(s) = \exp \int_b^s ds/\rho \quad \backslash^*$$

MERGEFORMAT (S11)

where  $s=b$  corresponds to  $r=1$ . One can derive below Eq. (S12) using Eqs. (S9) and (S11).

$$N(s) = n[f(s)]f(s)/\rho(s) \quad \backslash^*$$

MERGEFORMAT (S12)

If one employs  $\rho$  as the independent variable in place of  $s$  in Eq. (S11), we can then have

$$F(\rho) = \exp \int_1^\rho [s'(\rho)/\rho] d\rho \quad \backslash^*$$

MERGEFORMAT (S13)

By replacing  $f(s)$  in Eq. (S12) with Eq.(S13), the refractive index of the curved surface can be derived as

$$N(\rho) = n[F(\rho)]F(\rho)/\rho \quad \backslash^*$$

MERGEFORMAT (S14)

The left-hand side of Eq. (S14) can be applied to the arbitrary rotationally symmetric curved surface on which light can propagate. We take an example of a Rinehart-shaped surface of which the arc distance  $s$  can be expressed as  $s = \frac{1}{2}\rho + \frac{1}{2}\sin^{-1}\rho$ .

An analytical solution of Eq. (S14) regarding the Rinehart-shaped surface can be expressed as

$$N(\rho) = \frac{2}{\left(1 + \sqrt{1 - \rho^2}\right)^{\frac{1}{2}} \left( e^{\frac{\rho}{\left(1 + \sqrt{1 - \rho^2}\right)^{\frac{1}{2}}}} + e^{\frac{-\rho}{\left(1 + \sqrt{1 - \rho^2}\right)^{\frac{1}{2}}}} \right)} \quad \backslash^*$$

MERGEFORMAT (S15)

The proposed approach allows gradient index lenses to be mapped onto arbitrary rotationally symmetric curved surfaces to manipulate the wavefront of the guided-wave and thus enabling various singular phenomenon. Examples of Einstein's ring, invisible cloak, Maxwell fish-eye, and Luneburg lenses are demonstrated, for Rinehart-shaped surfaces, always leading to the requirements of isotropic permittivity. The structure is simulated by a commercial software COMSOL based on the finite element method. The computational domain has a perfect electric conductor (PEC) boundary for the top and bottom surfaces of the curvature and scattering boundary conditions around the edge. The cylindrical wave is excited by a point source, propagating from left to right with the  $E$ -field polarized along the  $z$ -axis.

## Section 2. Refractive index of the $\text{Ge}_2\text{Sb}_2\text{Te}_5$ at the different structural phase

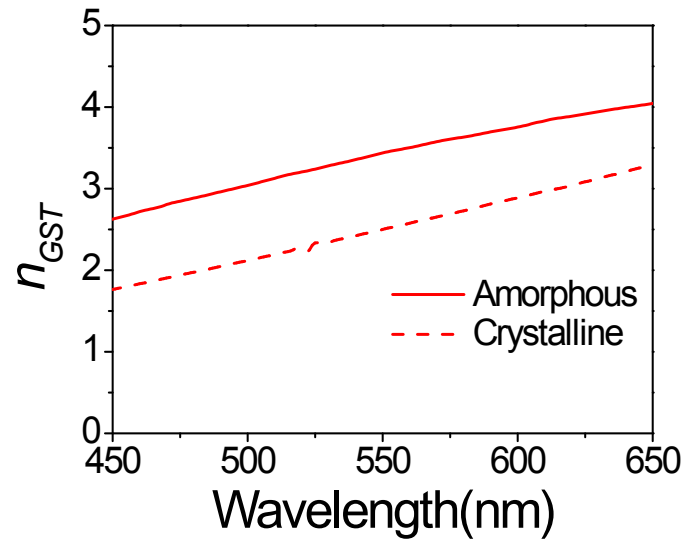

Figure S1. Refractive index  $n_{GST}$  vs wavelength for both amorphous and crystalline phases of  $Ge_2Sb_2Te_5$ <sup>27</sup>.

### Section 3. "On/Off" state of the multi-functions in the Rinehart-shaped surface

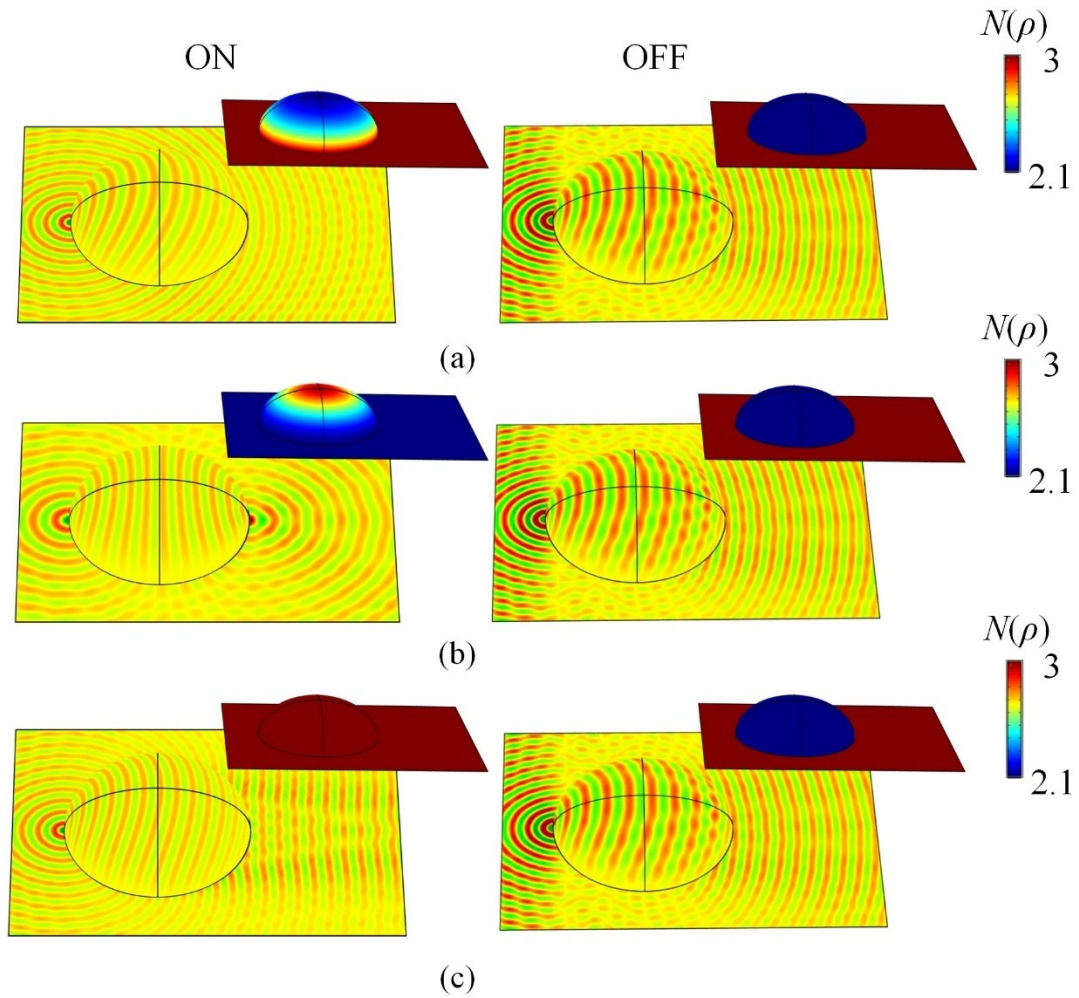

**Figure S2.** The left (right) columns show "on (off)" state of the functions of (a) invisible cloaking, (b) Maxwell fish-eye lens, and (c) Luneburg lens achieved by the Rinehart-shaped surface consisting of the  $\text{Ge}_2\text{Sb}_2\text{Te}_5$  dielectric with the refractive index distributions presented in the insets accordingly. The right columns show that the guided-wave fronts are severely distorted once the  $\text{Ge}_2\text{Sb}_2\text{Te}_5$  curvature is homogenously crystallized thus switches off the functionalities accordingly.

#### Section 4. The multi-functions in the Rinehart-shaped surface with the different discretization process

To explore the effect of the number of  $\text{Ge}_2\text{Sb}_2\text{Te}_5$  segments on the phenomenon of Einstein ring, Figure S3 illustrates the propagation of the incident wave ( $\lambda=500$  nm) across the curvatures that are divided into 6, 9, 12 and 15 slabs respectively. As can be observed, even the basic discretization of the required index profile (6-layered structure) can collimate the guided-wave. Thus, our design demonstrates an excellent tolerance of fabrication. The effect of the number of the  $\text{Ge}_2\text{Sb}_2\text{Te}_5$  segments on the other functions can be found in Figs.S4-S6.

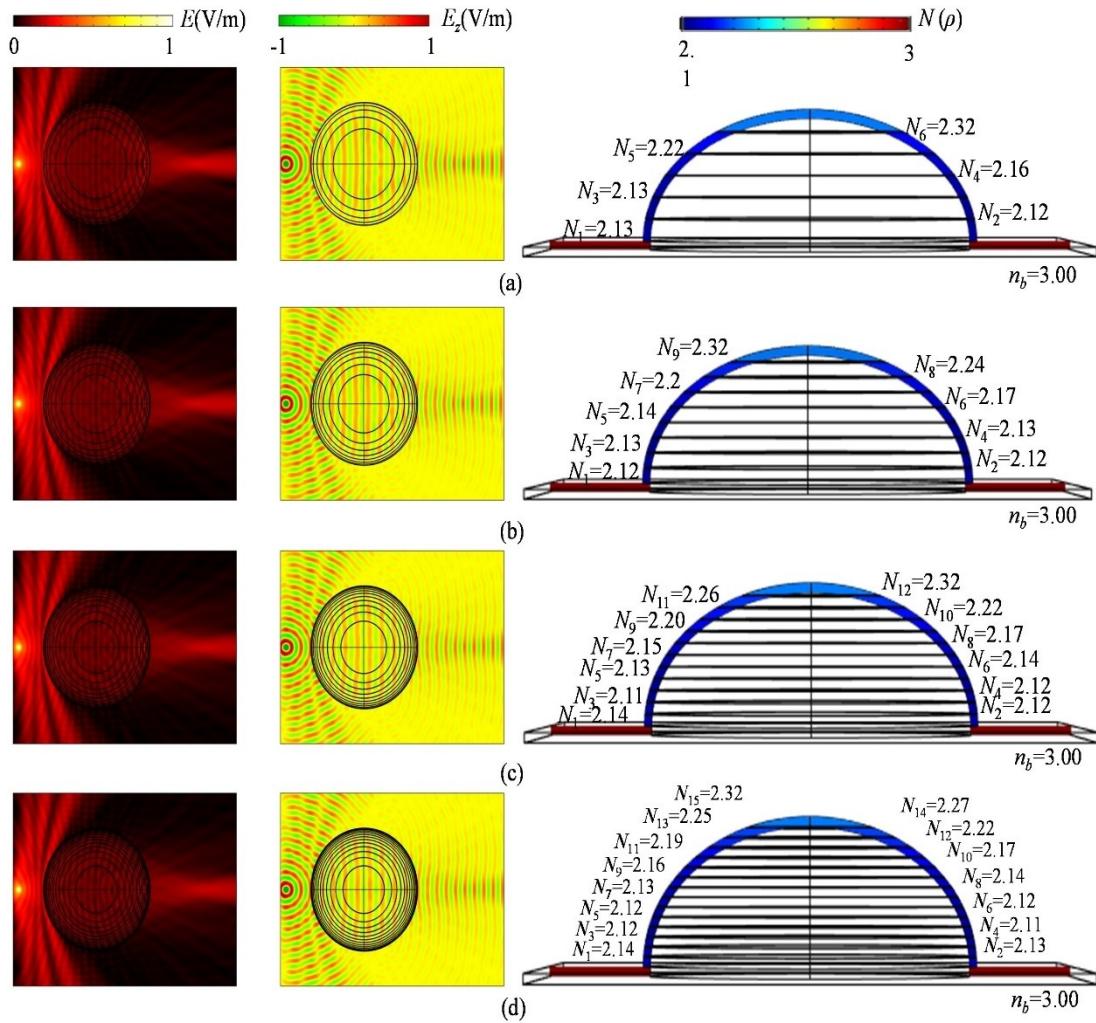

**Figure S3.** The propagation of  $E$  (left column) and  $E_z$  (central column) through the surface of (a) 6-layered, (b) 9-layered, (c) 12-layered, and (d) 15-layered Rinehart-shaped curvature at  $\lambda = 500$  nm, where the Einstein's ring phenomenon is imitated. The radial cross sections of the different discretization process are illustrated in the right columns.

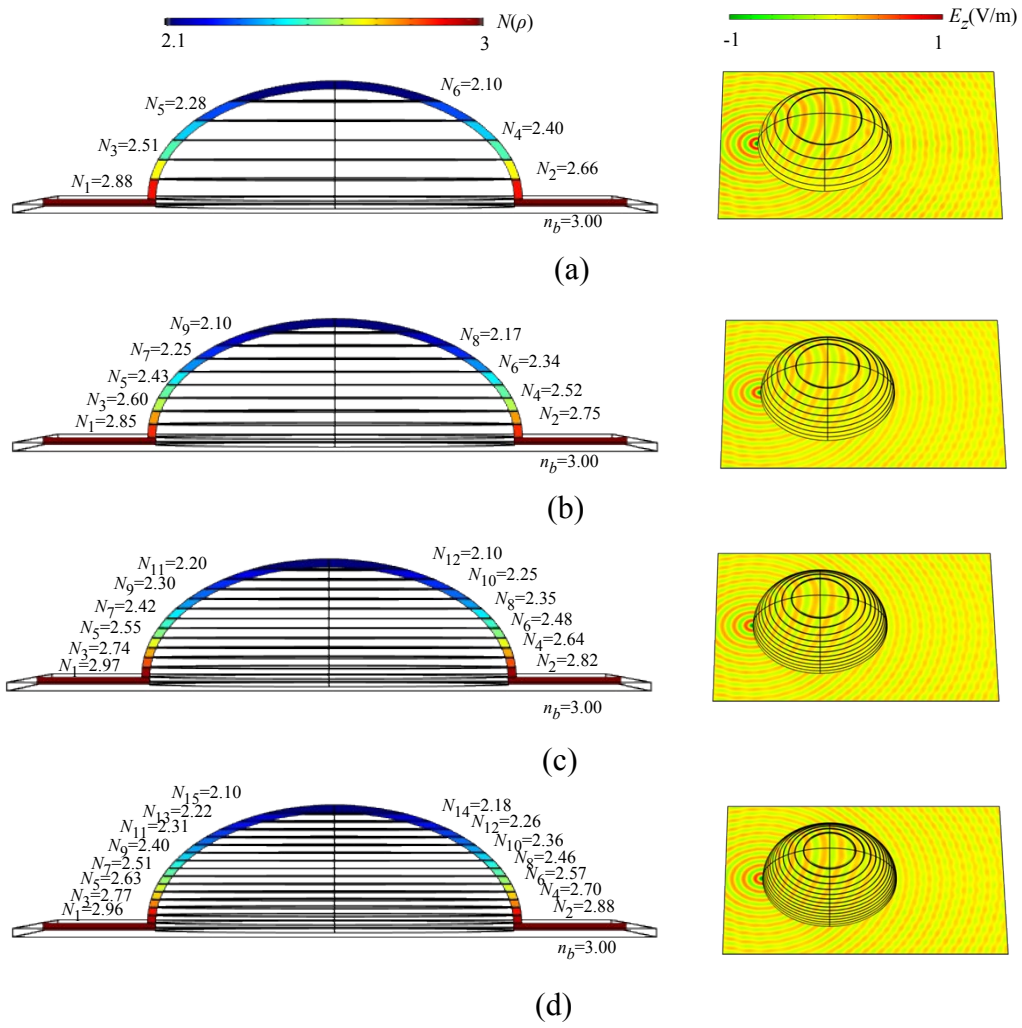

**Figure S4.** The propagation of  $E_z$  (right column) through the surfaces of (a) 6-layered, (b) 9-layered, (c) 12-layered, and (d) 15-layered Rinehart-shaped curvature at  $\lambda= 500$  nm, where the optical invisibility phenomenon is imitated. The radial cross sections of the different discretization process are shown in the left columns.

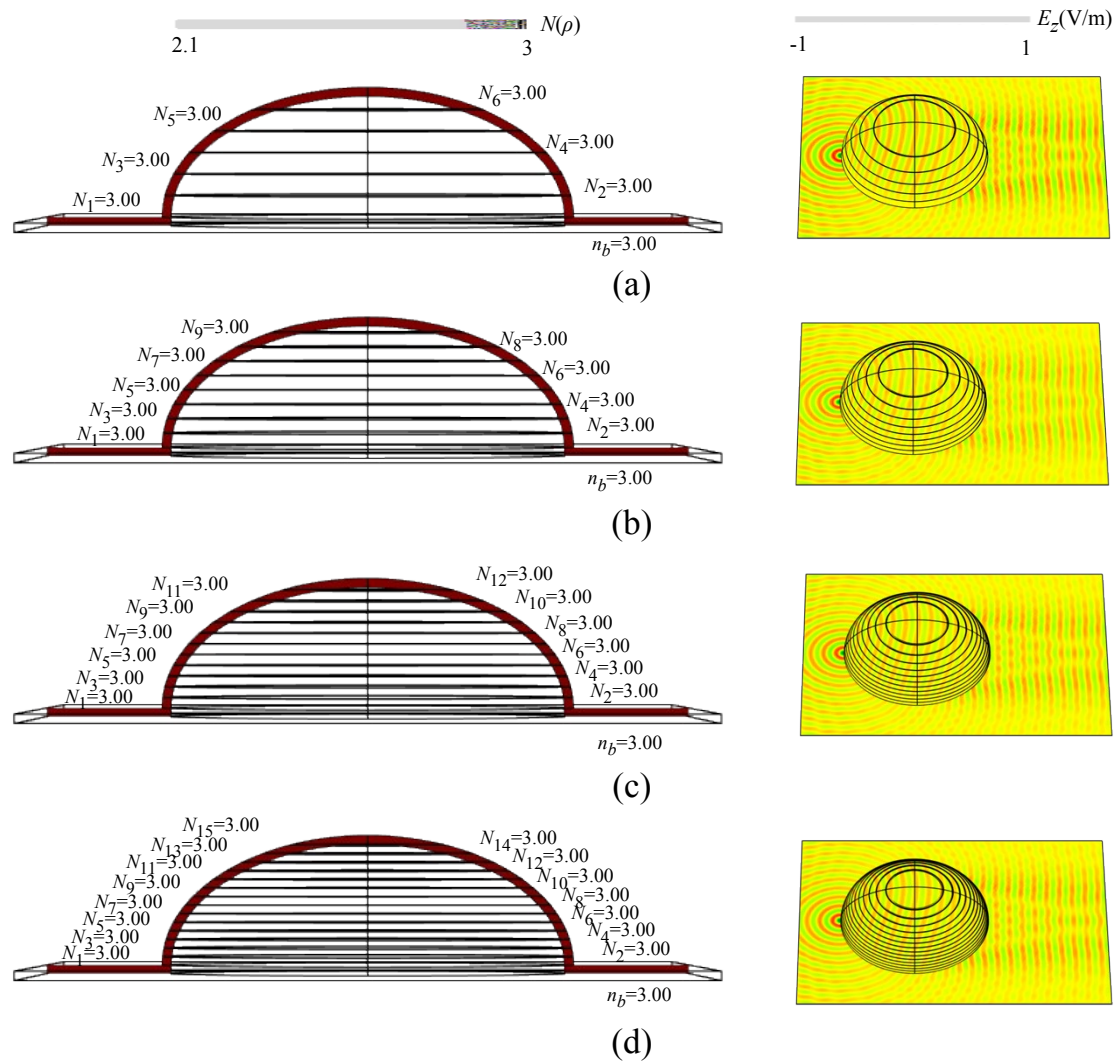

**Figure S5.** The propagation of  $E_z$  (right column) through the surfaces of (a) 6-layered, (b) 9-layered, (c) 12-layered, and (d) 15-layered Rinehart-shaped curvature at  $\lambda = 500$  nm, where the Luneburg lens is imitated. The radial cross sections of the different discretization process are illustrated in the left columns.

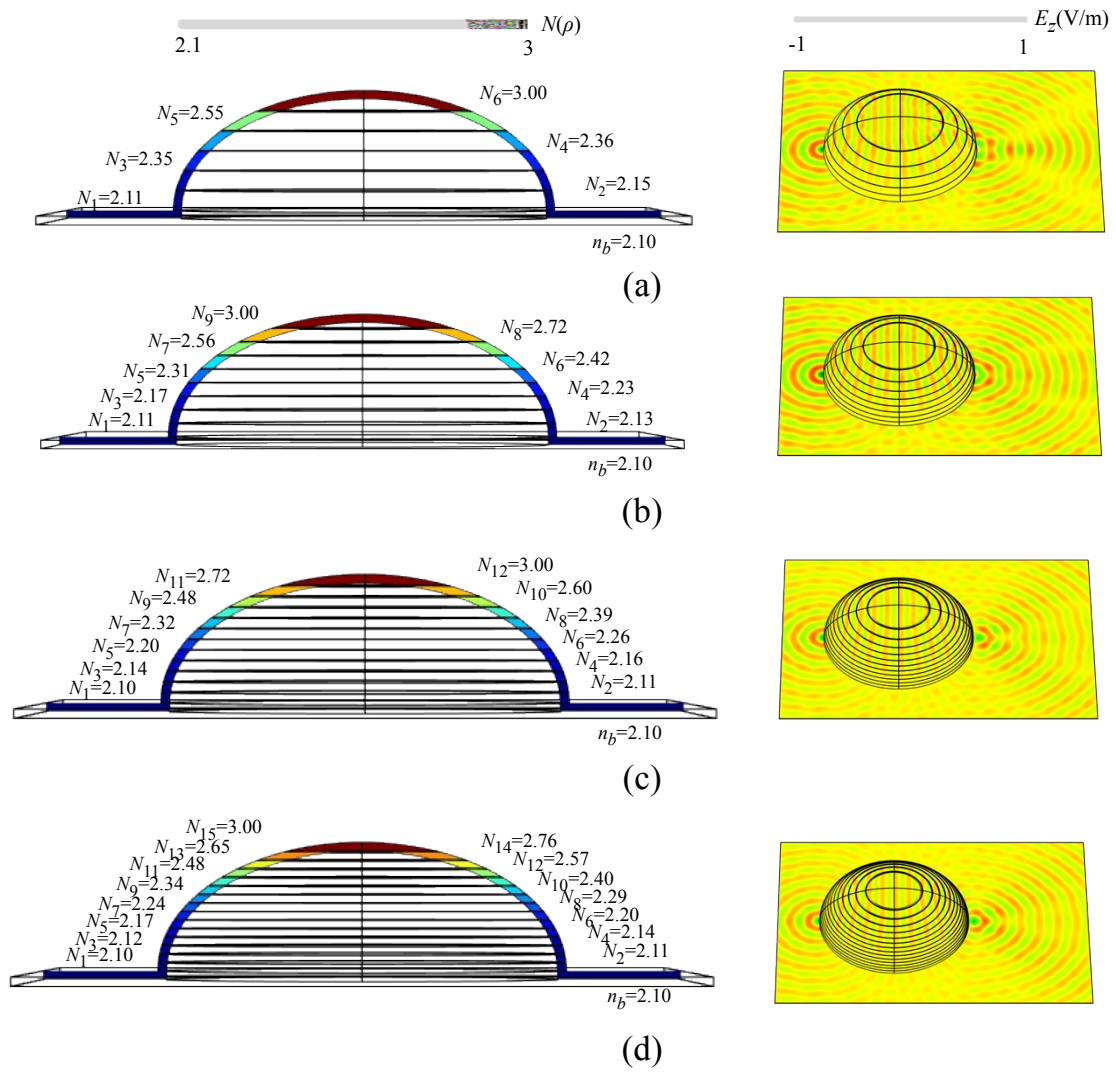

**Figure S6.** The propagation of  $E_z$  (right column) through the surfaces of (a) 6-layered, (b) 9-layered, (c) 12-layered, and (d) 15-layered Rinehart-shaped curvature at  $\lambda= 500$  nm, where the Maxwell fish eyes lens is imitated. The radial cross sections of the different discretization process are illustrated in the left columns.



## Section 5. The multi-functions in the Rinehart-shaped surface at the different wavelengths

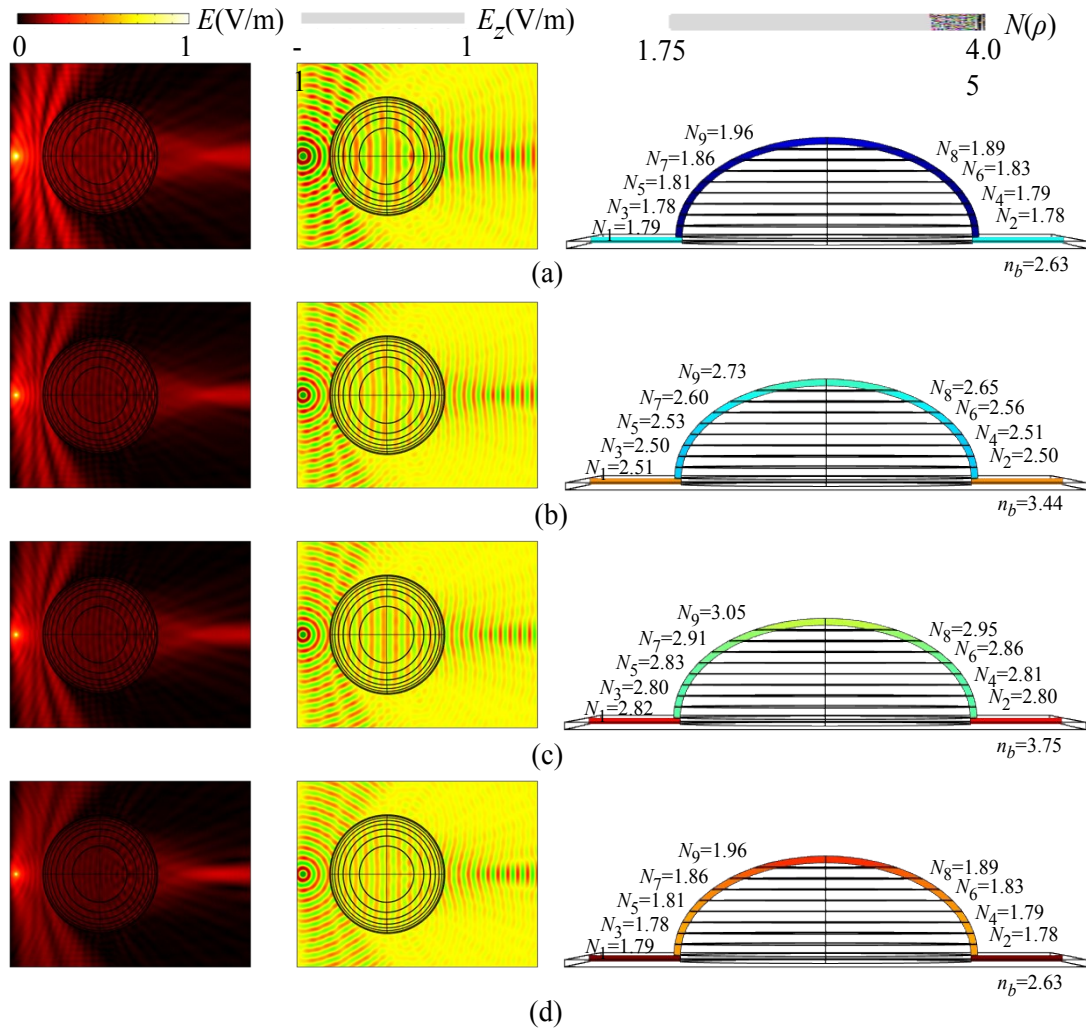

**Figure S7.** The propagation of  $E$  (left column) and  $E_z$  (central column) through the surface of 9-layered Rinehart-shaped curvature at (a)  $\lambda = 450$  nm, (b)  $\lambda = 550$  nm, (c)  $\lambda = 600$  nm, and (d)  $\lambda = 650$  nm, where the Einstein ring phenomenon is imitated.

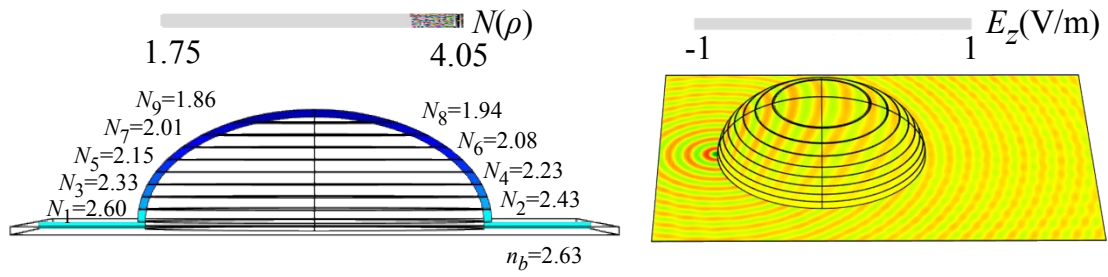

(a)  $\lambda = 450$  nm

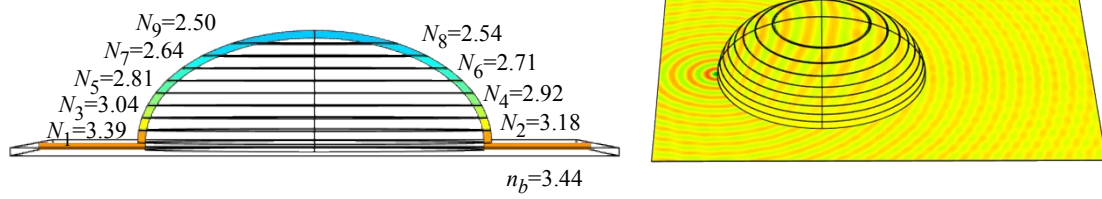

(b)  $\lambda = 550$  nm

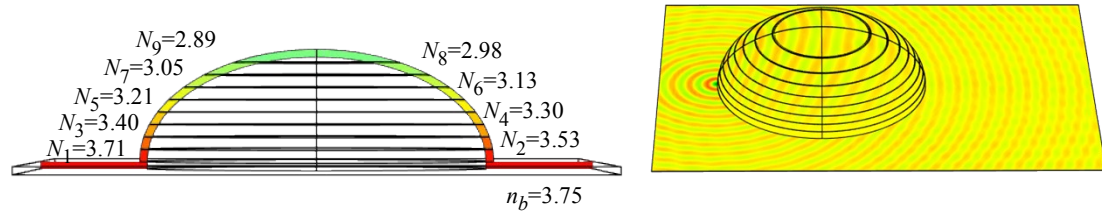

(c)  $\lambda = 600$  nm

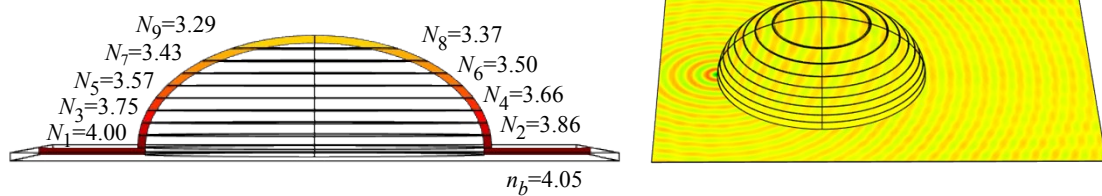

(d)  $\lambda = 650$  nm

**Figure S8.** The propagation of  $E_z$  (left column) through the surface of 9-layered Rinehart-shaped curvature at (a)  $\lambda = 450$  nm, (b)  $\lambda = 550$  nm, (c)  $\lambda = 600$  nm, and (d)  $\lambda = 650$  nm, where the optical invisibility is imitated. The left column shows the radial cross sections of the discretized Rinehart-shaped surface at the different wavelengths.

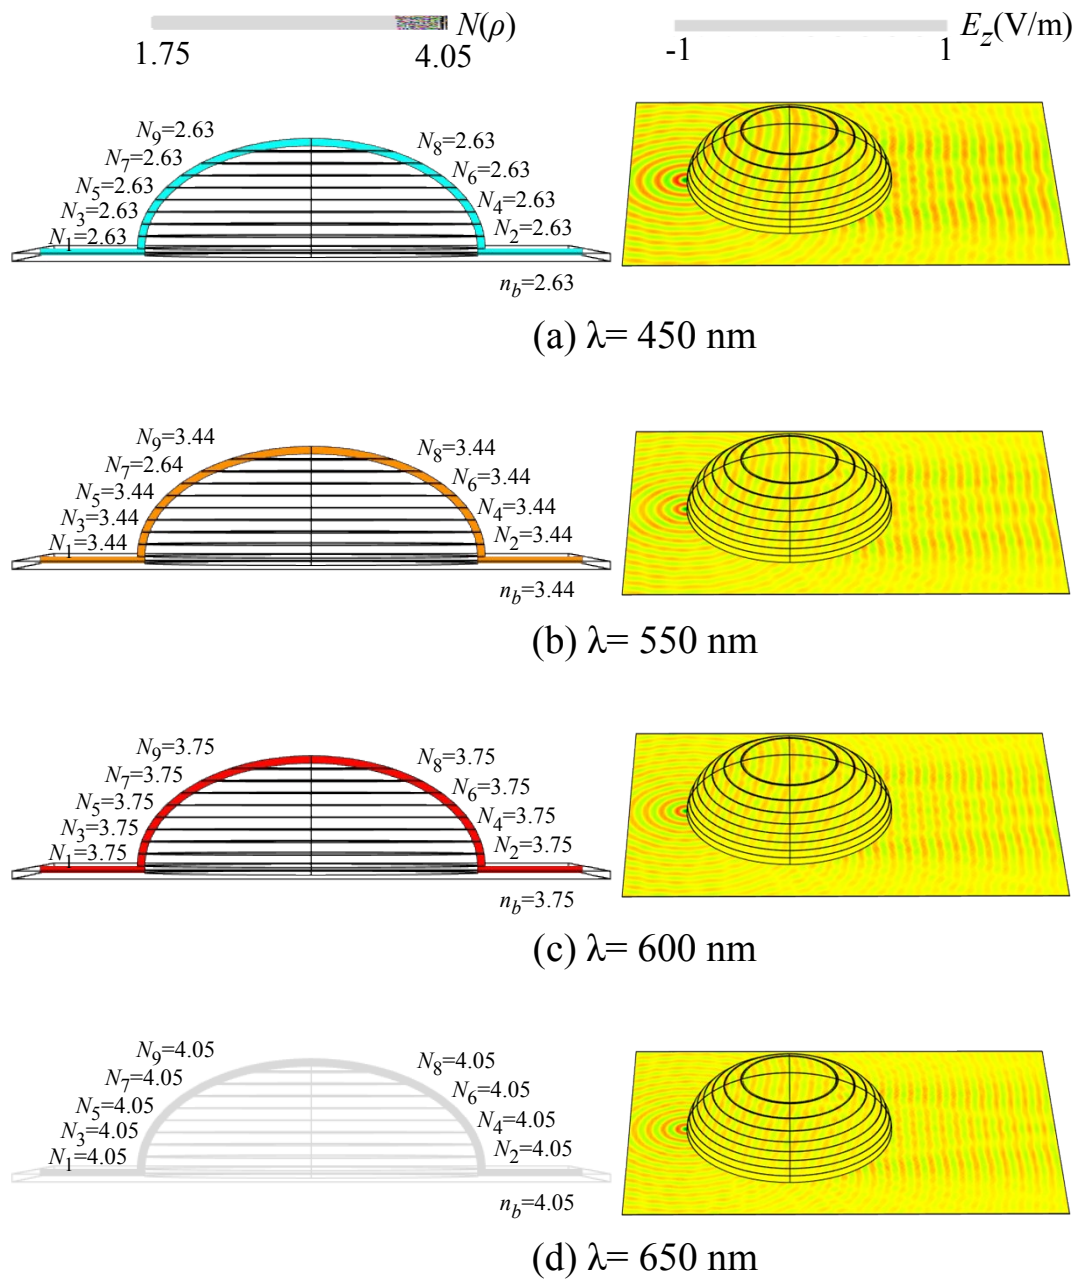

**Figure S9.** The propagation of  $E_z$  (left column) through the surface of 9-layered Luneburg-shaped curvature at (a)  $\lambda = 450$  nm, (b)  $\lambda = 550$  nm, (c)  $\lambda = 600$  nm, and (d)  $\lambda = 650$  nm, where the Luneburg lens is obtained. The left column shows the radial cross sections of the discretized Luneburg-shaped surface at the different wavelengths.

## Section 6. The conditions of the Ge<sub>2</sub>Sb<sub>2</sub>Te<sub>5</sub> slabs for the various functions.

**Table S1.** The corresponding crystallization proportion, time durations, and refractive index of each Ge<sub>2</sub>Sb<sub>2</sub>Te<sub>5</sub> slab for the invisible cloaking at  $\lambda = 500$  nm

| Layer   | Crystallization ratio | Time duration (ns) | Refractive index |
|---------|-----------------------|--------------------|------------------|
| #Ground | 0                     | 0                  | 3                |
| #1      | 16.7%                 | 8                  | 2.85             |
| #2      | 27.8%                 | 14                 | 2.75             |
| #3      | 44.4%                 | 22                 | 2.6              |
| #4      | 53.3%                 | 26                 | 2.52             |
| #5      | 63.3%                 | 31                 | 2.43             |
| #6      | 73.3%                 | 37                 | 2.34             |
| #7      | 83.3%                 | 42                 | 2.25             |
| #8      | 92.2%                 | 46                 | 2.17             |
| #9      | 100%                  | 50                 | 2.10             |

**Table S2.** The corresponding crystallization proportion, time durations, and refractive index of each Ge<sub>2</sub>Sb<sub>2</sub>Te<sub>5</sub> slab for the Maxwell fish-eye lens  $\lambda = 500$  nm

| Layer   | Crystallization ratio | Time duration (ns) | Refractive index |
|---------|-----------------------|--------------------|------------------|
| #Ground | 100%                  | 50                 | 2.1              |
| #1      | 100%                  | 50                 | 2.1              |
| #2      | 97.2%                 | 48                 | 2.13             |
| #3      | 93.4%                 | 46                 | 2.17             |
| #4      | 87.3%                 | 43                 | 2.23             |
| #5      | 79.3%                 | 39                 | 2.31             |
| #6      | 67.9%                 | 33                 | 2.42             |
| #7      | 53.5%                 | 26                 | 2.56             |
| #8      | 36.3%                 | 18                 | 2.72             |
| #9      | 0                     | 0                  | 3.0              |

**Table S3.** The corresponding crystallization proportion, time durations, and refractive index of each Ge<sub>2</sub>Sb<sub>2</sub>Te<sub>5</sub> slab for the Einstein ring at  $\lambda = 500$  nm

| Layer   | Crystallization ratio | Time duration (ns) | Refractive index |
|---------|-----------------------|--------------------|------------------|
| #Ground | 0                     | 0                  | 3                |
| #1      | 98%                   | 49                 | 2.12             |
| #2      | 98%                   | 49                 | 2.12             |
| #3      | 97%                   | 48                 | 2.13             |
| #4      | 97%                   | 48                 | 2.13             |
| #5      | 95%                   | 47                 | 2.14             |
| #6      | 92%                   | 46                 | 2.17             |
| #7      | 89%                   | 44                 | 2.2              |
| #8      | 84%                   | 42                 | 2.24             |
| #9      | 76%                   | 38                 | 2.32             |

## Section 7. Description of the supporting movie.

It shows that the wavefront of a guided wave propagating across the layered curvature can be dynamically modulated via the stream of  $t_{bias}$ . Our device possesses an excellent performance of the continuous reconfigurability and versatile reprogrammable functions. The dynamic variations of the refractive index and temperature of each Ge<sub>2</sub>Sb<sub>2</sub>Te<sub>5</sub> layer for the different functionalities are presented simultaneously. However in order to simplify the movie, we only plot out the temperature distributions of the #Ground layer, layer #1 and #9.
